# Supplementary figures and images for: Noninvasive Mapping of Angiotensin Converting Enzyme-2 in Pigeons Using Micro Positron Emission Tomography
Source: MDPI journal article supplement (doi:10.3390/life12060793), 2022-05-26

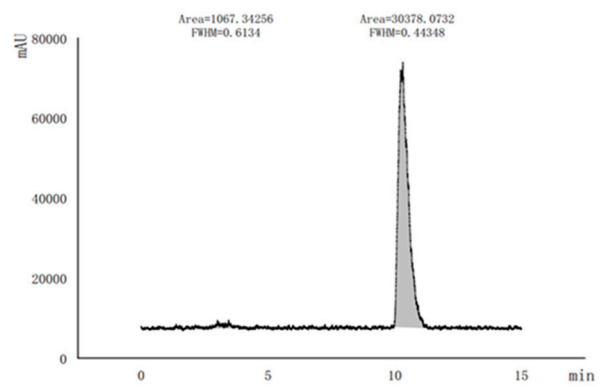

**Figure S1.** Radio-HPLC of  $^{68}\text{Ga}$ -HZ20.

Supplement: s1 [file s1]
